# Supplementary material for: Targeting mitochondria in cancer therapy could provide a basis for the selective anti-cancer activity
Source: PLoS One. 2019 Mar 25;14(3):e0205623. doi: 10.1371/journal.pone.0205623 (PMC6433232; doi:10.1371/journal.pone.0205623)
Supplement: S1 Table — (XLSX) [file pone.0205623.s001.xlsx]

## Sheet: Read me
Supplementary Table S1
Summary_Info tab:
Column	Column Header	Description
A, D, G	Screen N1, N2, and N3	names of inhibitors used in a screen
B, E, H	EC50 decrease, fold	Ratio of EC50 for inhibitor to EC50 for inhibitor/NSC130362 combination

## Sheet: Treatment results
Combined treatment of kinase inhibitors with NSC130362 against leukemia cells from patients
	EC50 decrease, fold			EC50 decrease, fold			EC50 decrease, fold
Screen N 1			Screen N 2			Screen N 3
GS-1101 (CAL-101)	506.312		Trametinib (GSK1120212)	398.467		PI-103	1089.91
AZD1480	497.297		Elesclomol	302.193		SB-431542	1058.17
Linifanib (ABT-869)	260.989		17-AAG (Tanespimycin)	12.118		KU-55933	959.287
GSK-1838705A	257.65		APTO-253-Quizartinib	7.84148		GDC-0879	952.589
Ruxolitinib (INCB018424)	219.619		YM-155	4.41731		Tofacitinib (CP-690550)	941.063
Erlotinib	106.478		PP242	4.04447		Gefitinib	778.145
Bay 11-7085	69.0189		GDC-0941	3.86398		Vandetanib (ZD6474)	755.616
GW-2580	43.1698		Taselisib (GDC-0032)	2.75781		Sorafenib	681.036
GSK-1904529A	41.5947		PI-103	2.59537		Barasertib (AZD1152-HQPA)	642.828
Cytarabine	28.6383		AT7519	2.19982		Vandetanib (ZD6474)	617.335
Entospletinib (GS-9973)	16.7523		CPI-267203	2.11907		17-AAG (Tanespimycin)	612.856
MK-2206	15.887		Crenolanib	1.63303		Ruxolitinib (INCB018424)	593.127
Bosutinib (SKI-606)	15.8063		APTO-253 - Ibrutinib	1.4819		Vemurafenib (PLX-4032)	581.854
Tivozanib (AV-951)	15.635		Selumetinib (AZD6244)	1.46791		Sunitinib	549.236
SU11274	11.8953		Linifanib (ABT-869)	1.37253		Dasatinib	549.191
Crizotinib (PF-2341066)	11.4334		Crenolanib	1.25942		GSK-1838705A	522.045
NF-kB Activation Inhibitor	11.2352		A-674563	1.23998		Doramapimod (BIRB 796)	511.198
YM-155	10.8721		Afatinib (BIBW-2992)	1.20831		Quizartinib (AC220)	464.573
17-AAG (Tanespimycin)	10.622		Panobinostat	1.16801		Ruxolitinib (INCB018424)	433.084
AT7519	9.69874		Regorafenib (BAY 73-4506)	1.16005		Canertinib (CI-1033)	424.307
Dasatinib	9.59947		Ponatinib (AP24534)	1.07047		Rapamycin	379.61
Panobinostat	9.3026		Flavopiridol	1.05663		Lapatinib	371.084
Cediranib (AZD2171)	8.27116		JNJ-7706621	1.04447		GS-1101 (CAL-101)	356.419
PRT062607	8.13761		3G8	1		Erlotinib	355.101
Quizartinib (AC220)	7.67529		8-cl-Adenosine	1		Ponatinib (AP24534)	343.246
JNJ-38877605	7.63039		ABT-199 - Ibrutinib	1		Crizotinib (PF-2341066)	322.576
Lapatinib	7.6183		ABT-199 (BH3 mimetic)	1		CYT387	320.062
Tozasertib (VX-680)	7.547		ABT-737	1		Erlotinib	266.84
ABT-199 (BH3 mimetic)	7.42615		AGI-5198	1		Azacytidine	266.407
Lapatinib	6.74598		AGI-6780	1		PRT062607	264.984
Erlotinib	6.51654		Alisertib (MLN8237)	1		Vemurafenib (PLX-4032)	263.938
XAV-939	6.49383		APTO-253	1		Bay 11-7085	221.88
GDC-0941	6.47342		Array-382	1		Ponatinib (AP24534)	200.309
Selumetinib (AZD6244)	6.47		Array-382	1		Pazopanib (GW786034)	193.265
Crizotinib (PF-2341066)	6.31351		Arsenic Trioxide	1		Trametinib (GSK1120212)	183.22
MLN120B	6.23092		AUS-131	1		Pazopanib (GW786034)	170.628
MGCD-265	6.00007		Axitinib (AG-013736)	1		Quizartinib (AC220)	151.645
SNS-032 (BMS-387032)	5.99516		Azacytidine	1		Sorafenib	148.399
Neratinib (HKI-272)	5.67387		AZD1480	1		Crizotinib (PF-2341066)	144.557
Ibrutinib (PCI-32765)	5.63036		Barasertib (AZD1152-HQPA)	1		Sunitinib	142.28
ABT-737	5.44281		Bay 11-7085	1		Ponatinib (AP24534)	141.739
BEZ235	3.95993		BMS-345541	1		MLN120B	121.231
JNJ-7706621	3.74843		Bosutinib (SKI-606)	1		Crizotinib (PF-2341066)	107.539
Gefitinib	3.61519		Cabozantinib (XL-184)	1		MGCD-265	97.5998
GDC-0941	3.37865		Cediranib (AZD2171)	1		Dovitinib (CHIR-258)	96.7218
LY-333531	3.28336		CHIR-99021	1		Tivozanib (AV-951)	89.9206
Cabozantinib (XL-184)	3.1991		CI-1040 (PD184352)	1		Ponatinib (AP24534)	82.7152
NVP-ADW742	3.10878		Crizotinib (PF-2341066)	1		SR9011	82.3746
A-674563	3.0948		Crizotinib (PF-2341066)	1		Ruxolitinib (INCB018424)	73.8559
VX-745	2.87777		CYT387	1		Volasertib (BI-6727)	68.4814
Canertinib (CI-1033)	2.76301		Cytarabine	1		SGX-523	66.3986
Sorafenib	2.67634		Dasatinib	1		Lapatinib	57.0443
RAF265 (CHIR-265)	2.60355		Dasatinib	1		Crizotinib (PF-2341066)	48.1917
Dovitinib (CHIR-258)	2.60054		DBZ	1		JAK Inhibitor I	46.1946
H-89	2.57422		Doramapimod (BIRB 796)	1		Pelitinib (EKB-569)	45.9686
Flavopiridol	1.98713		Dovitinib (CHIR-258)	1		GSK-1904529A	44.7564
Lenvatinib	1.91053		Entospletinib (GS-9973)	1		Sunitinib	42.8982
Quizartinib (AC220)	1.84233		Erlotinib	1		Sorafenib	39.565
TG100-115	1.81277		Erlotinib	1		PP242	31.8579
Ponatinib (AP24534)	1.73994		Foretinib (XL880)	1		Bosutinib (SKI-606)	29.5948
ABT-199 - Ibrutinib	1.68456		GDC-0575	1		Midostaurin (PKC412)	25.1128
Palbociclib	1.63597		GDC-0879	1		Afatinib (BIBW-2992)	18.3995
SGX-523	1.63539		GDC-0941	1		AGI-6780	16.988
KW-2449	1.61099		GDC-0994	1		Ponatinib (AP24534)	15.0058
Saracatinib (AZD0530)	1.47294		Gefitinib	1		SNS-032 (BMS-387032)	13.9867
JQ1	1.46827		Gefitinib	1		Sunitinib	11.1128
Nilotinib	1.46181		GS-1101 (CAL-101)	1		ABT-199 (BH3 mimetic)	9.39725
Crenolanib	1.45745		GSK-1838705A	1		Sorafenib	9.25162
Pelitinib (EKB-569)	1.42567		GSK-1904529A	1		BEZ235	8.78003
STO609	1.40514		GSK690693	1		Ponatinib (AP24534)	8.757
Gefitinib	1.3886		GW-2580	1		Sorafenib	8.62126
Trametinib (GSK1120212)	1.37494		GW-2580	1		A-674563	6.24879
Sunitinib	1.30961		Idesanutlin	1		PD173955	5.09296
MLN8054	1.30449		Imatinib	1		Quizartinib (AC220)	4.95134
Roscovitine (CYC-202)	1.29371		Ipatasertib (GDC-0068)	1		Dasatinib	4.21284
BMS-345541	1.22345		IWP2	1		Ponatinib (AP24534)	3.87373
Azacitidine-CM	1.1563		IWR1	1		Masitinib (AB-1010)	3.7301
Midostaurin (PKC412)	1.13682		JAK Inhibitor I	1		Erlotinib	3.61393
Crenolanib	1.13183		JNJ-28312141	1		Vandetanib (ZD6474)	3.23592
Elesclomol	1.07498		JNJ-38877605	1		GDC-0941	2.8745
Tofacitinib (CP-690550)	1.07478		KI20227	1		Gefitinib	2.86879
Azacytidine	1.06873		KU-55933	1		Erlotinib	2.71569
PHA-665752	1.05608		KW-2449	1		Dasatinib	2.58203
Alisertib (MLN8237)	1.04822		Lapatinib	1		JNJ-28312141	2.32715
AGI-5198	1		Lapatinib	1		Ponatinib (AP24534)	2.2606
AGI-6780	1		Lenvatinib	1		Foretinib (XL880)	2.20092
AGI-6780 - CM	1		LGK974	1		Sorafenib	2.01995
Arsenic Trioxide	1		LY-333531	1		Sorafenib	2.01594
Barasertib (AZD1152-HQPA)	1		Masitinib (AB-1010)	1		Ibrutinib (PCI-32765)	1.89968
CHIR-99021	1		MGCD-265	1		Imatinib	1.83031
Motesanib (AMG-706)	1		Midostaurin (PKC412)	1		Brigatininb (AP-26113)	1.76758
Nilotinib	1		MK-2206	1		Palbociclib	1.76226
Pazopanib (GW786034)	1		MLN120B	1		Quizartinib (AC220)	1.6162
PHT-427	1		MLN8054	1		Lenvatinib	1.47216
Ruxolitinib (INCB018424)	1		Motesanib (AMG-706)	1		Lenalidomide	1.35318
S31-201	1		Neratinib (HKI-272)	1		Ruxolitinib (INCB018424)	1.30819
SB-431542	1		NF-kB Activation Inhibitor	1		Gilteritinib (ASP-2215)	1.29341
Vemurafenib (PLX-4032)	1		Nilotinib	1		ABT-199 - Ibrutinib	1.22791
Vemurafenib (PLX-4032)	1		Nilotinib	1		Ponatinib (AP24534)	1.22339
Vismodegib (GDC-0449)	1		Nutlin 3a	1		Azacitidine-CM	1.17069
Regorafenib (BAY 73-4506)	0.961712		NVP-ADW742	1		Ibrutinib (PCI-32765)	1.15086
DBZ	0.951257		NVP-TAE684	1		AT7519	1.14822
GDC-0879	0.893738		ON-01910	1		GSK690693	1.14556
PD173955	0.879873		Palbociclib	1		Elesclomol	1.11742
CI-1040 (PD184352)	0.862268		Pazopanib (GW786034)	1		LY-333531	1.09597
JAK Inhibitor I	0.847162		PD173955	1		KI20227	1.03438
GW-2580	0.741672		PHA-665752	1		AGI-6780 - CM	1
Foretinib (XL880)	0.66618		PHT-427	1		Arsenic Trioxide	1
Imatinib	0.637381		PRT062607	1		Axitinib (AG-013736)	1
KI20227	0.628188		Quizartinib (AC220)	1		CHIR-99021	1
NVP-TAE684	0.550358		Quizartinib (AC220)	1		Crenolanib	1
Afatinib (BIBW-2992)	0.519791		Rapamycin	1		Dasatinib	1
Vandetanib (ZD6474)	0.519287		Rapamycin	1		Linifanib (ABT-869)	1
PP242	0.494829		Roscovitine (CYC-202)	1		Lovastatin	1
Axitinib (AG-013736)	0.475628		Ruxolitinib (INCB018424)	1		MK-2206	1
Velcade	0.457079		Ruxolitinib (INCB018424)	1		Motesanib (AMG-706)	1
PI-103	0.45158		S31-201	1		Nilotinib	1
Ponatinib (AP24534)	0.33536		Saracatinib (AZD0530)	1		NVP-ADW742	1
Sunitinib	0.317586		SB-431542	1		PHT-427	1
JNJ-28312141	0.287022		SGX-523	1		Rapamycin	1
Dasatinib	0.271717		Sorafenib	1		Ruxolitinib (INCB018424)	1
Vatalanib (PTK787)	0.245199		STO609	1		S31-201	1
Vargetef	0.228869		SU11274	1		Selumetinib (AZD6244)	1
KU-55933	0.222227		Sunitinib	1		TG100-115	1
Sorafenib	0.219903		Sunitinib	1		Vismodegib (GDC-0449)	1
Gilteritinib (ASP-2215)	0.205099		TG100-115	1		XAV-939	1
Volasertib (BI-6727)	0.191838		Tivozanib (AV-951)	1		YM-155	1
Masitinib (AB-1010)	0.173595		Tofacitinib (CP-690550)	1		Ibrutinib (PCI-32765)	0.967847
GSK690693	0.164848		Tozasertib (VX-680)	1		Neratinib (HKI-272)	0.956522
Doramapimod (BIRB 796)	0.15015		UNC 2025A	1		KW-2449	0.945028
CYT387	0.116693		Vandetanib (ZD6474)	1		Nutlin 3a	0.943741
Nutlin 3a	0.0963985		Vargetef	1		Tozasertib (VX-680)	0.933615
INK-128	0.0632153		Vatalanib (PTK787)	1		Lapatinib	0.801499
Rapamycin	0.0547391		Vemurafenib (PLX-4032)	1		Axitinib (AG-013736)	0.779466
Brigatininb (AP-26113)	0.017895		Vemurafenib (PLX-4032)	1		NVP-TAE684	0.755427
Rapamycin	0.015301		Vismodegib (GDC-0449)	1		Ruxolitinib (INCB018424)	0.73017
			VX-745	1		Vatalanib (PTK787)	0.722671
			XAV-939	1		Ponatinib (AP24534)	0.713938
			JQ1	0.990825		Lapatinib	0.710547
			Ponatinib (AP24534)	0.921456		Gefitinib	0.635529
			APTO-253 - OTX-015	0.906996		Quizartinib (AC220)	0.631609
			Sorafenib	0.892377		Ruxolitinib (INCB018424)	0.59308
			SNS-032 (BMS-387032)	0.892059		Crenolanib	0.590469
			Ibrutinib (PCI-32765)	0.870961		JQ1	0.547866
			INK-128	0.857272		Sorafenib	0.440149
			Pelitinib (EKB-569)	0.842789		Erlotinib	0.382796
			SCH-772984	0.839576		DBZ	0.37368
			H-89	0.814164		AZD1480	0.364889
			OTX-015	0.804053		Alisertib (MLN8237)	0.299059
			APTO-253-JQ1	0.779524		H-89	0.287378
			CPI-0610	0.766617		Cabozantinib (XL-184)	0.258962
			RAF265 (CHIR-265)	0.762023		PHA-665752	0.226152
			Canertinib (CI-1033)	0.718596		Quizartinib (AC220)	0.206168
			BEZ235	0.710928		JNJ-7706621	0.181748
			Combimetinib (GDC-0973)	0.612721		AGI-5198	0.160393
			Velcade	0.467539		GW-2580	0.153688
			Volasertib (BI-6727)	0.386214		Vargetef	0.139783
						Cytarabine	0.131573
						Entospletinib (GS-9973)	0.130593
						Ruxolitinib (INCB018424)	0.124519
						Lapatinib	0.123209
						INK-128	0.0858009
						Flavopiridol	0.0682911
						CI-1040 (PD184352)	0.066724
						Ibrutinib (PCI-32765)	0.0663717
						Velcade	0.0645324
						NF-kB Activation Inhibitor	0.0601836
						RAF265 (CHIR-265)	0.0556048
						VX-745	0.0542745
						Roscovitine (CYC-202)	0.0452594
						Regorafenib (BAY 73-4506)	0.0284084
						Saracatinib (AZD0530)	0.0257482
						GW-2580	0.0188259
						BMS-345541	0.00952577
						JNJ-38877605	0.00828566
						Dasatinib	0.00767099
						Cediranib (AZD2171)	0.00538238
						Dasatinib	0.00470151
						Erlotinib	0.0038958
						Axitinib (AG-013736)	0.00373008
						Gefitinib	0.00234301
						Ruxolitinib (INCB018424)	0.00220558
						Lapatinib	0.0015347
						Panobinostat	0.00140444
						GDC-0941	0.00135067
						Crenolanib	0.00123107
						Crenolanib	0.001151
						Ruxolitinib (INCB018424)	0.000999922
						MLN8054	0.000963068
						ABT-737	0.000856777
						STO609	0.000816377
						SU11274	0.000744975
